# Supplementary material for: Structural and functional comparison of SARS-CoV-2-spike receptor binding domain produced in Pichia pastoris and mammalian cells
Source: PubMed Central journal article supplement (PMC7732851; doi:10.1038/s41598-020-78711-6), 2020-12-11
Supplement: 41598_2020_78711_MOESM1_ESM.pdf [file 41598_2020_78711_MOESM1_ESM.pdf]

## Supplementary Material

### Structural and Functional Comparison of SARS-CoV-2-Spike Receptor Binding Domain Produced in *Pichia pastoris* and Mammalian Cells

Argentinian AntiCovid Consortium<sup>†</sup>

<sup>†</sup> A comprehensive list of consortium members appears at the end of the paper. Correspondence and requests for materials should be addressed to the Argentinian AntiCovid Consortium (email: [anticovid.arg@gmail.com](mailto:anticovid.arg@gmail.com)).

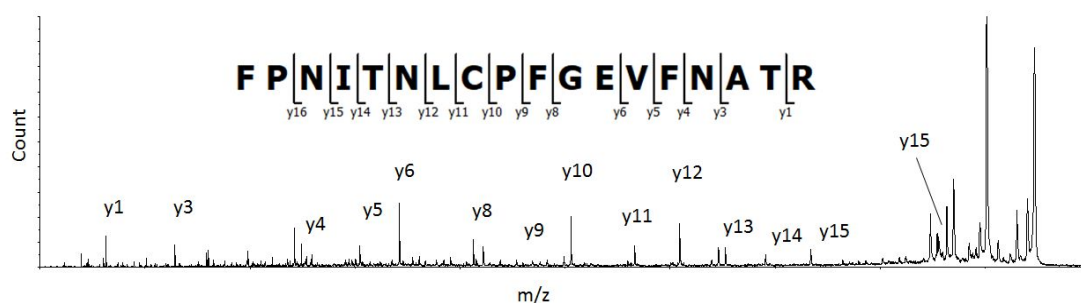

**Figure S1.** Signal assignment for the FPNITNLCPFGEVFNATR spectrum from *P. pastoris* RBD sample; in the inset, sequence assignment details.

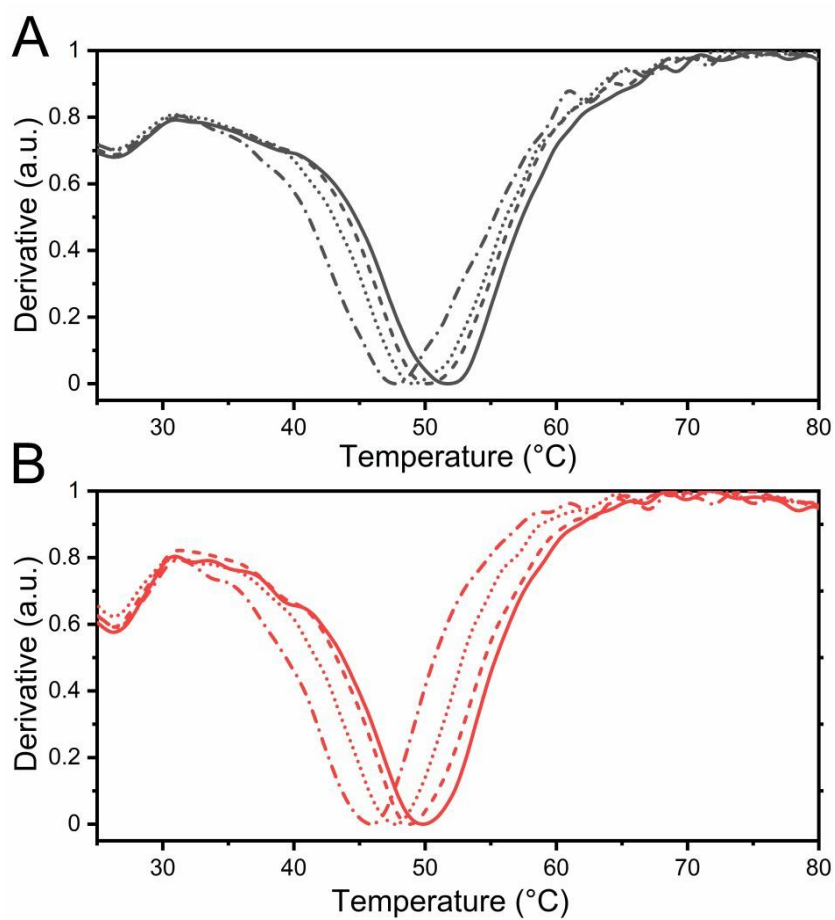

**Figure S2. Derivative of temperature-induced Denaturation of RBD monitored by Sypro-Orange Fluorescence.** Protein (5  $\mu$ M) was prepared in buffer 50 mM sodium phosphate, pH 7.0, at different NaCl concentrations: 75 mM (solid line), 150 mM (dash line), 300mM (dot line) and 500mM (dash-dot line). (A) RBD obtained from HEK-293T and (B) RBD expressed on *P. pastoris*.

**Author information:**

**Consortia:**

**Argentinian AntiCovid Consortium:**

Claudia R. Arbeitman,<sup>1,2,3</sup> Gabriela Auge,<sup>1,4</sup> Matías Blaustein,<sup>1,4</sup> Luis Bredeston,<sup>5,6</sup> Enrique S. Corapi,<sup>4</sup> Patricio O. Craig,<sup>7,8</sup> Leandro A. Cossio,<sup>9,22</sup> Liliana Dain,<sup>1,4,10</sup> Cecilia D’Alessio,<sup>1,4</sup> Fernanda Elias,<sup>11</sup> Natalia B. Fernández,<sup>1,4</sup> Yamila B. Gándola,<sup>4</sup> Javier Gasulla,<sup>1,4,12</sup> Natalia Gorojovsky,<sup>7,8</sup> Gustavo E. Gudesblat,<sup>1,4</sup> María G. Herrera,<sup>1,4</sup> Lorena I. Ibañez,<sup>13,14</sup> Tommy Idrovo,<sup>4</sup> Matías Iglesias Rando,<sup>5,8</sup> Laura Kamenetzky,<sup>4,15</sup> Alejandro D. Nadra,<sup>1,4</sup> Diego G. Nosedá,<sup>16</sup> Carlos H. Paván,<sup>17,18</sup> María F. Pavan,<sup>13,14</sup> María F. Pignataro,<sup>4</sup> Ernesto Roman,<sup>6,7</sup> Lucas A. M. Ruberto,<sup>19,20,21</sup> Natalia Rubinstein,<sup>1,4</sup> Javier Santos,<sup>1,4,7</sup> Francisco Velazquez<sup>4,8</sup> and Alicia M. Zelada<sup>9,22</sup>.

<sup>1</sup>Consejo Nacional de Investigaciones Científicas y Técnicas (CONICET). Godoy Cruz 2290 C1425FQB, Buenos Aires, Argentina.

<sup>2</sup>GIBIO-Universidad Tecnológica Nacional-Facultad Regional Buenos Aires. Medrano 951 C1179AAQ, Buenos Aires, Argentina.

<sup>3</sup>Theoretical Physics and Center of Interdisciplinary Nanostructure Science and Technology, Universität Kassel. Heinrich-Plett-Str. 40, 34132, Kassel, Germany.

<sup>4</sup>Universidad de Buenos Aires. Facultad de Ciencias Exactas y Naturales. Departamento de Fisiología y Biología Molecular y Celular. Instituto de Biociencias, Biotecnología y Biología Traslacional (iB3). Buenos Aires, Argentina.

<sup>5</sup>Universidad de Buenos Aires. Facultad de Farmacia y Bioquímica. Departamento de Química Biológica. Junín 965 C1113AAD. Buenos Aires, Argentina.

<sup>6</sup>CONICET-Universidad de Buenos Aires. Instituto de Química y Fisicoquímica Biológicas. (IQUIFIB). Buenos Aires, Argentina.

<sup>7</sup>Universidad de Buenos Aires. Facultad de Ciencias Exactas y Naturales. Departamento de Química Biológica. Buenos Aires, Argentina.

<sup>8</sup>CONICET-Universidad de Buenos Aires. Instituto de Química Biológica de la Facultad de Ciencias Exactas y Naturales (IQUIBICEN). Buenos Aires, Argentina.

<sup>9</sup>Universidad de Buenos Aires. Facultad de Ciencias Exactas y Naturales. Departamento de Fisiología y Biología Molecular y Celular. Laboratorio de Agrobiotecnología. Buenos Aires, Argentina.

<sup>10</sup>Centro Nacional de Genética Médica, Avda Las Heras 2670, 3er piso, C1425ASP, Buenos Aires, Argentina.

<sup>11</sup>Instituto de Ciencia y Tecnología Dr. César Milstein (Consejo Nacional de Investigaciones Científicas y Técnicas-Fundación Pablo Cassará). Saladillo 2468 C1440FFX, Buenos Aires, Argentina.

<sup>12</sup>Universidad Nacional de la Plata-CONICET. Centro de Investigaciones del Medio Ambiente (CIM). La Plata, Argentina.

<sup>13</sup>Consejo Nacional de Investigaciones Científicas y Técnicas (CONICET). Instituto de Ciencia y Tecnología Dr. César Milstein. Saladillo 2468, C1440FFX, Buenos Aires, Argentina.

<sup>14</sup>CONICET-Universidad de Buenos Aires. Instituto de Química Física de los Materiales, Medio Ambiente y Energía (INQUIMAE), Buenos Aires, Argentina.

<sup>15</sup>CONICET-Universidad de Buenos Aires. Facultad de Medicina. Instituto de Investigaciones en Microbiología y Parasitología (IMPAM). Buenos Aires, Argentina.

<sup>16</sup>Universidad Nacional de San Martín-CONICET. Instituto de Investigaciones Biotecnológicas (IIBio). San Martín, Buenos Aires, Argentina.

<sup>17</sup>Universidad de Buenos Aires. Facultad de Farmacia y Bioquímica. Buenos Aires, Argentina.

<sup>18</sup>CONICET-Universidad de Buenos Aires. Facultad de Medicina. LANAIS-PROEM. Instituto de Química y Fisicoquímica Biológicas. (IQUIFIB). Buenos Aires, Argentina.

<sup>19</sup>Universidad de Buenos Aires. Facultad de Farmacia y Bioquímica. Departamento de Microbiología, Inmunología, Biotecnología y Genética. Buenos Aires, Argentina.

<sup>20</sup>CONICET-Universidad de Buenos Aires. Facultad de Farmacia y Bioquímica. Instituto de Nanobiotecnología (NANOBIOTEC). Buenos Aires. Argentina.

<sup>21</sup>Instituto Antártico Argentino. Ministerio de Relaciones Exteriores y Culto. Buenos Aires, Argentina.

<sup>22</sup>CONICET-Universidad de Buenos Aires. Instituto de Biodiversidad y Biología Experimental y Aplicada (IBBEA). Buenos Aires, Argentina.

### **Contributions**

The Argentinian AntiCovid Consortium performed the experimental work and drafted the manuscript. All authors (listed in alphabetical order) contributed equally to this work.
